# Supplementary material for: Carbon Nanotube‐Based Reinforced Polymers for Medical Applications: Improving Impact Strength of Polymer‐Polymer Composites
Source: Hindawi journal article supplement (doi:10.1155/2022/1760198), 2022-01-01
Supplement: f1 [file 1760198.f1.docx]

Table S1: Results obtained from the mechanical tensile test applied to the HDPE-UHMWPE. Presented values correspond to the mean ± standard deviation (±SD) of the data.

| Sample no. | Young’s modulus  ±SD | Yield point  ±SD | Ultimate stress  ±SD | Elongation at ultimate  ±SD | Fracture stress  ±SD | Elongation at break  ±SD |
| --- | --- | --- | --- | --- | --- | --- |
| 1 | 379.17±69.58 | 3.18±0.69 | 19.39±0.95 | 23.09±2.43 | 3.54±0.82 | 171.04±34.93 |
| 2 | 138.72±62.09 | 4 ±0.30 | 19.59±1.43 | 23.95±2.90 | 7.21±4.54 | 102.49±55.07 |
| 3 | 215.46±59.21 | 4.27±0.22 | 21.11±0.40 | 25.23±2.05 | 13.79±5.52 | 87.16±29.97 |
| 4 | 128.92±58.16 | 4.06±0.30 | 19.91±1.95 | 23.31±2.86 | 3.95±1.19 | 100.36±36.70 |
| 5 | 173.75±124.45 | 4.3±0.35 | 19.66±1.24 | 20.01±2.09 | 7.33±4.03 | 78.27±40.22 |
| 6 | 372.02±78.27 | 4.65±0.11 | 20.79±1.43 | 44.49±13.35 | 5.61±1.76 | 79.17±4.72 |
| 7 | 558.06±107.64 | 2.14±0.08 | 15.95±4.47 | 13.92±5.67 | 5.53±6.47 | 28.22±8.10 |
| 8 | 502.60±88.14 | 2.2±0.29 | 8.43±2.75 | 7.89±1.34 | 3.52±3.56 | 19.20±11.6 |
| 9 | 744.47±353.64 | 2.63±0.96 | 16.04±8.02 | 11.33±0.96 | 6.22±3.38 | 18.35±9.20 |
| 10 | 630.77±323.86 | 3.46±0.89 | 15.06±5.28 | 8.45±1.04 | 8.06±6.79 | 11.11±1.61 |
| 11 | 400.27±55.71 | 2.02±0.22 | 5.64±1.10 | 5.73±0.47 | 3.42±1.99 | 7.26±2.07 |

Table S2: Results obtained from the mechanical tensile test applied to the HDPE-UHMWPE-MWCNT samples. Presented values correspond to the mean ± standard deviation (±SD) of the data.

| Sample no. | Young’s modulus  ±SD | Yield  point  ±SD | Ultimate stress  ±SD | Elongation at ultimate  ±SD | Fracture stress  ±SD | Elongation at break  ±SD |
| --- | --- | --- | --- | --- | --- | --- |
| 12 | 447.02±96.43 | 50.06±0.08 | 24.60±2.15 | 23.63±2.04 | 18.64±3.79 | 31.17±5.47 |
| 13 | 355.562±148.25 | 84.2±18.4 | 21.24±1.15 | 21.09±2.82 | 9.69±3.93 | 32.27±13.99 |
| 14 | 424.11±87.19 | 96.2±5.07 | 24.65±0.85 | 23.56±2.59 | 8.83±4.89 | 58.26±22.06 |
| 15 | 754.62±377.79 | 104±28.70 | 25.43±9.35 | 22.73±2.68 | 10.19±6.00 | 44.67±17.98 |
| 16 | 824.7±543.03 | 70±21.60 | 27.42±7.98 | 21.75±2.32 | 10.07±7.02 | 41.86±9.24 |
| 17 | 396.66±163.35 | 78.6±11.27 | 23.80±1.43 | 22.43±1.52 | 10.69±3.66 | 34.22±7.42 |
| 18 | 365.46±97.22 | 82±11.66 | 21.136±2.14 | 27.74±2.48 | 9.73±2.33 | 44.32±7.96 |
| 19 | 555.81±169.54 | 102±4 | 28.57±9.26 | 25.81±3.06 | 17.47±5.26 | 35.81±12.05 |
| 20 | 535.68±139.50 | 74±8 | 21.18±1.41 | 26.55±6.74 | 11.82±3.49 | 42.94±17.67 |
| 21 | 302.24±60.72 | 91.4±24.32 | 17.30±2.80 | 21.10±6.47 | 5.63±3.42 | 36.74±22.22 |


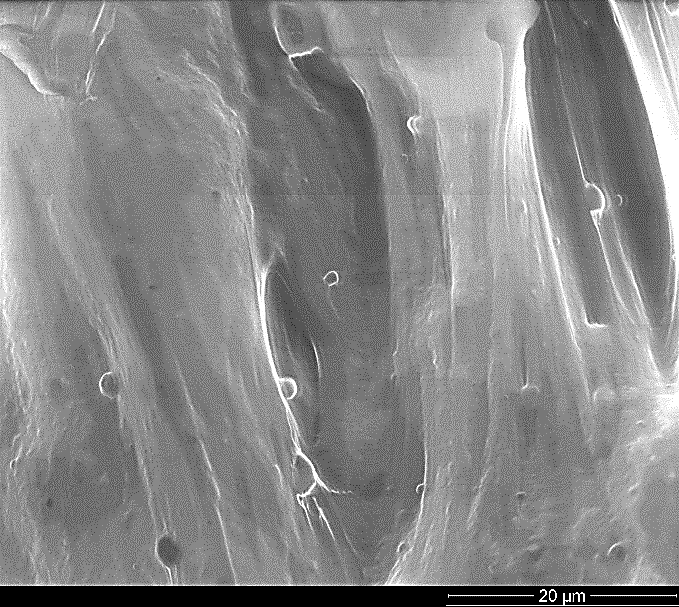

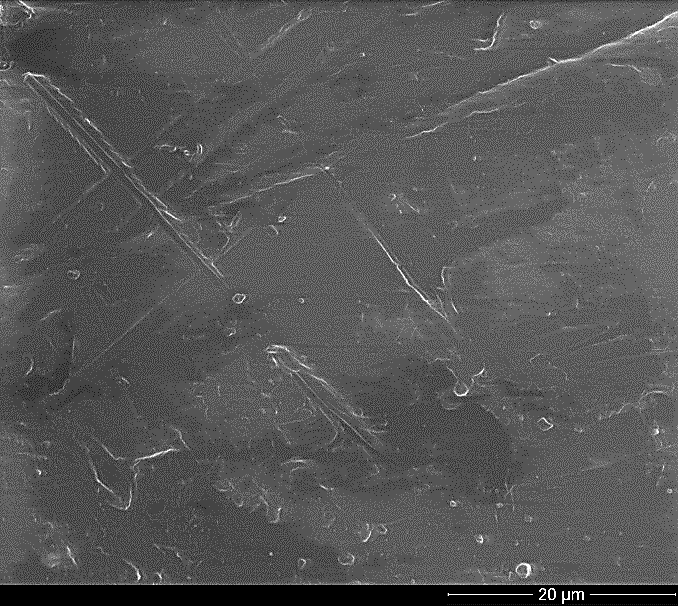


b

a

Figure S3: SEM analysis for samples with and without addition of MWCNTs: (a) sample 13 (49% HDPE-50% UHMWPE-1% MWCNTs) and (b) sample 6 (50% HDPE-50% UHMWPE) for the scale bar represents 20 μm.
